# Supplementary material
Source: PubMed Central journal article supplement (PMC3020518)
Supplement: supp_85_3_1174__3.pdf [file supp_85_3_1174__3.pdf]

| Sheep   | Tissue | Clinical +ve Path +ve (number) | Incubation time range (days) | Incubation time (days $\pm$ SE) | Clinical -ve Path +ve (number) | Survivors, path negative >660dpi (number) |
|---------|--------|--------------------------------|------------------------------|---------------------------------|--------------------------------|-------------------------------------------|
| BSE T-1 | brain  | 6                              | 494-607                      | 551 $\pm$ 19                    | 8                              | 4                                         |
| BSE T-2 | brain  | 7                              | 457-581                      | 527 $\pm$ 18                    | 3                              | 1                                         |
| BSE T-3 | brain  | 4                              | 511-569                      | 544 $\pm$ 12                    | 6                              | 0                                         |
| BSE T-4 | brain  | 10                             | 350-499                      | 426 $\pm$ 18                    | 3                              | 0                                         |

**Table S1.** Transmission of experimental sheep BSE to RIII wild type mice.

Brain homogenates prepared from four individual sheep infected with BSE were inoculated separately into groups of RIII mice. Animals were monitored for signs of TSE disease, and culled at a defined clinical endpoint or due to intercurrent illness. The data show the variability that can be observed on primary inoculation of mice with experimental sheep BSE. Incidence of disease ranged from 78% to 100%, with incubation times ranging from 350 days to 607 days. These observations are not uncommon in primary transmission studies.

*N. Hunter and M. Bruce. Data from Defra funded project SE1428.*
